# Supplementary material
Source: publisher figshare collection journal article supplement (https://geolsoc.figshare.com/ndownloader/files/14229749)
Supplement: Supplementary file 1 [file 14229749]

## Sheet:  HN-LC Trondhjemites
Table S3. Mineral chemistry of feldspars from high-Na - low-Ca trondhjemites
Sample	V18
Type	Pl1							Pl2							Kfs_i			Kfs_c
Location	ICO	±1s	OCO	±1s	RIM	±1s		ICO	±1s	OCO	±1s	RIM	±1s		INCL	±1s		INTERST	±1s
n	4		5		6			6		9		8			13			3
SiO2 (wt%)	65.08	0.190175	64.78	0.834626	63.96	2.15635		64.6517	0.297215	64.72	0.480176	64.6475	0.49123		65.06	0.247459		64.72	0.591805
Al2O3	21.4	0.219773	21.816	0.79324	22.65	2.1751		21.5583	0.472289	21.38	0.354753	21.4325	0.431765		18.66	0.306985		19.11	0.955528
CaO	1.92	0.334701	1.982	0.518093	1.99	0.19685		1.85667	0.385988	1.8	0.516962	1.895	0.251453		0.04	0.0822208		0.02	0.0288675
Na2O	11.11	0.331562	11.214	0.610516	11.22	0.268229		11.5583	0.311218	11.77	0.373765	11.6825	0.283687		0.89	0.382844		0.45	0.143643
K2O	0.5	0.509215	0.21	0.0868907	0.18	0.0637704		0.368333	0.398518	0.32	0.242183	0.335	0.214276		15.34	0.556285		15.7	0.411461
Total	100.01		100.002		100			99.9933		99.99		99.9925			99.99			100
Si	2.87	0.00585235	2.8592	0.0319014	2.83	0.0877648		2.85983	0.0110529	2.86	0.0176808	2.86125	0.0179025		2.99	0.0114281		2.98	0.0318957
Al	1.11	0.0122848	1.1336	0.0428054	1.18	0.116456		1.123	0.0246333	1.11	0.0192318	1.117	0.023616		1.01	0.0155423		1.04	0.0499032
Ca	0.09	0.0157268	0.0936	0.0243578	0.09	0.00903327		0.088	0.0181769	0.09	0.0245142	0.089875	0.0119575		0	0.00409972		0	0.0011547
Na	0.95	0.0278971	0.9596	0.0545509	0.97	0.0256047		0.9915	0.0275155	1.01	0.0320291	1.00275	0.0255049		0.08	0.0340209		0.04	0.0126623
K	0.03	0.0287677	0.012	0.00509902	0.01	0.0037238		0.021	0.0225743	0.02	0.0135994	0.018875	0.0120409		0.9	0.034408		0.92	0.0255799
Total	5.05		5.058		5.08			5.08333		5.09		5.08975			4.98			4.98
Ab	88.9	1.41657	90.02	2.14872	90.2	1.08074		90.0833	0.691134	90.74	1.71618	90.2125	0.714018		8.11	3.48819		4.1	1.249
An	8.5	1.36137	8.84	2.5026	8.83	0.871015		8	1.6334	7.67	2.22261	8.1125	1.19575		0.22	0.409972		0.07	0.11547
Or	2.63	2.75847	1.12	0.438178	0.95	0.361939		1.93333	2.09444	1.6	1.23187	1.7	1.07438		91.65	3.31552		95.8	1.21244
Total	100.03		99.98		99.98			100.017		100.01		100.025			99.98			99.97
Mean values given; n = number of analyses
Pl1 = Primary plagioclase
Pl2 = Secondary plagioclase
Kfs_i = K - feldspar included in plagioclase
Kfs_c = Interstitial K - feldspar
ICO = inner core
OCO = outer core
